# Supplementary material for: Slanted, asymmetric microfluidic lattices as size-selective sieves for continuous particle/cell sorting
Source: Royal Society of Chemistry journal article supplement (doi:10.1039/c6lc01237j), 2016-12-05
Supplement: c6lc01237j1.pdf [file c6lc01237j1.pdf]

## Supplementary Information

for

### Slanted, asymmetric microfluidic lattices as size-selective sieves for continuous particle/cell sorting

Masumi Yamada,<sup>a,\*</sup> Wataru Seko,<sup>a</sup> Takuma Yanai,<sup>a</sup> Kasumi Ninomiya<sup>b</sup>,  
and Minoru Seki<sup>a</sup>

<sup>a</sup> Department of Applied Chemistry and Biotechnology, Graduate School of Engineering,  
Chiba University, 1-33 Yayoi-cho, Inage-ku, Chiba 263-8522, Japan.

<sup>b</sup> Asahi Kasei Corp., 2-1 Samejima, Fuji-shi, Shizuoka 416-8501, Japan.

\*m-yamada@faculty.chiba-u.jp

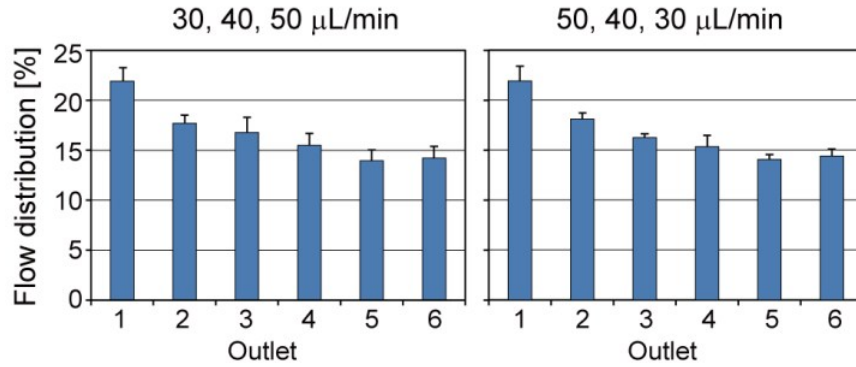

**Figure S1.** Distribution of volumetric flow rates to each outlet, when Microdevice A was used. The input flow rates from three inlets (from Inlets 1, 2, and 3) were changed as indicated.

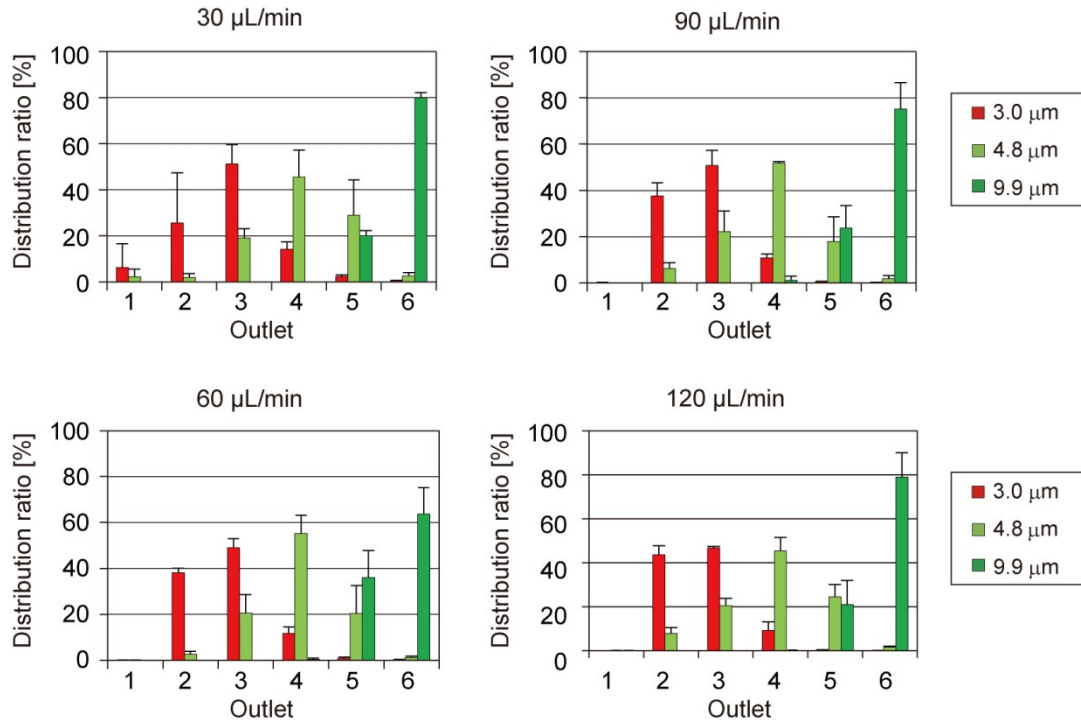

**Figure S2.** Sorting results of standard particles using microdevice A, when the total input flow rate was changed from 30 to 120 µL/min as indicated, whereas the ratio of the input flow rates was kept constant ( $Q_1 : Q_2 : Q_3 = 3 : 4 : 5$ ). Each data represents the mean  $\pm$  SD from 3 experimental results.

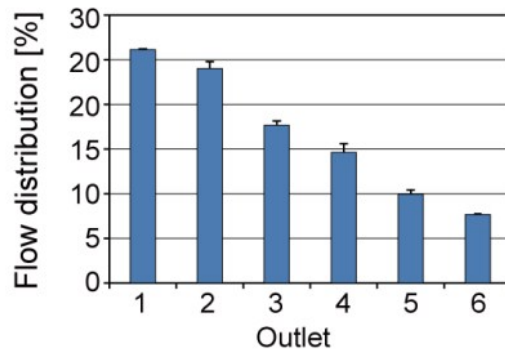

**Figure S3.** Distribution of volumetric flow rates to each outlet, when the microdevice shown in Figure 9 (a) was used. The input flow rates from Inlets 1, 2, and 3 were 10, 10, and 40  $\mu\text{L}/\text{min}$ , respectively.

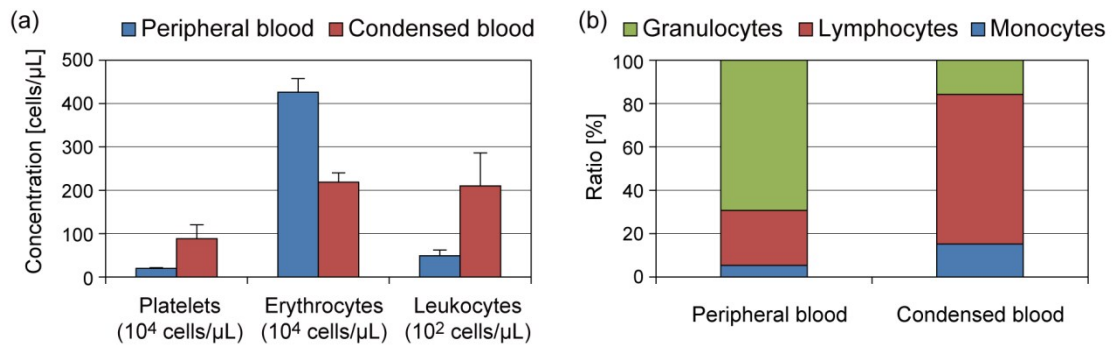

**Figure S4.** Compositions of the prepared condensed blood samples in comparison with the native peripheral blood samples. (a) Concentrations of platelets, erythrocytes, and leukocytes, and (b) sub-population of leukocytes.
